# Supplementary material for: High efficiency organosilicon-containing polymer sensors for the detection of trinitrotoluene and dinitrotoluene
Source: Royal Society of Chemistry journal article supplement (doi:10.1039/c6tc01892k), 2016-01-01
Supplement: c6tc01892k1.pdf [file c6tc01892k1.pdf]

Supporting information

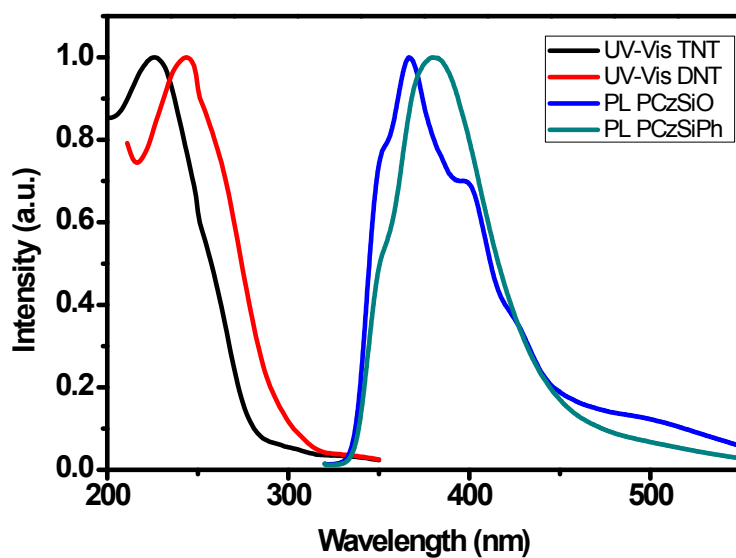

Figure S1. Uv-Vis spectra of TNT and TNT, PL spectra of PCzSiO and PCzSiPh.

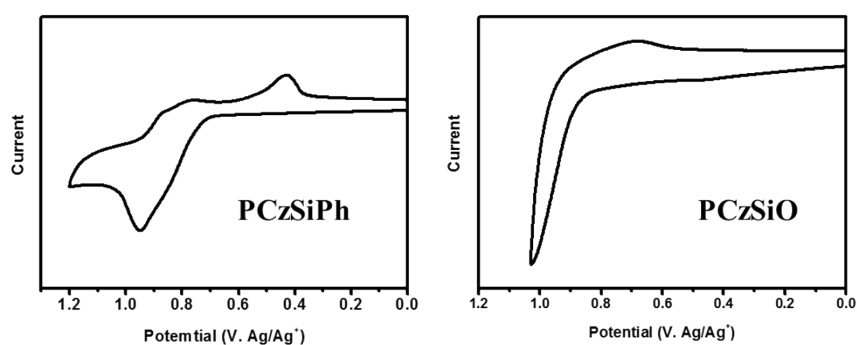

Figure S2. CV curves of PCzSiO and PCzSiPh.

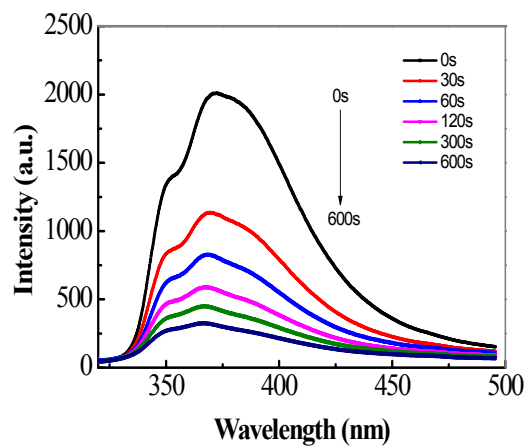

Figure S3. Time-dependent fluorescence intensity of PCzSiPh film in TNT. The film thickness is 12 nm.

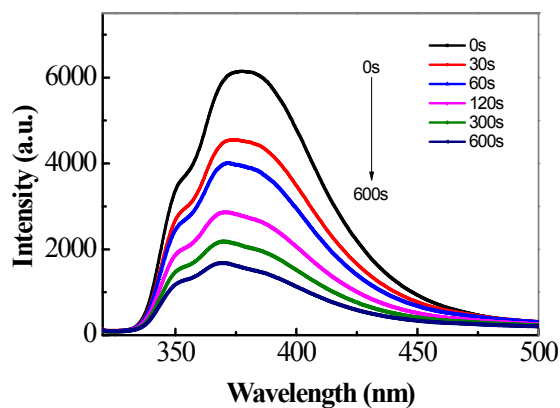

Figure S4. Time-dependent fluorescence intensity of PCzSiPh film in TNT. The film thickness is 52 nm.

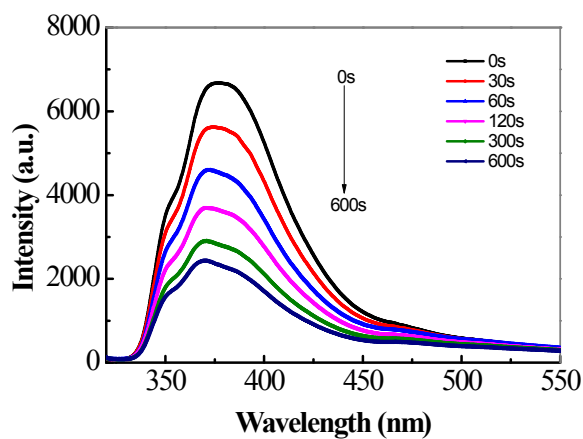

Figure S5. Time-dependent fluorescence intensity of PCzSiPh film in TNT. The film thickness is 95 nm.

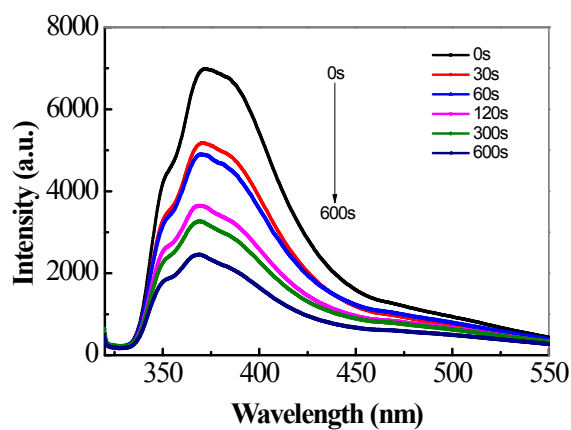

Figure S6. Time-dependent fluorescence intensity of PCzSiPh film in TNT. The film thickness is 122 nm.

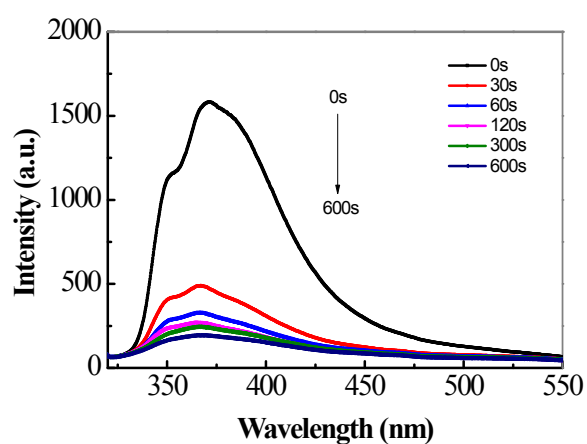

Figure S7. Time-dependent fluorescence intensity of PCzSiPh film in DNT. The film thickness is 12 nm.

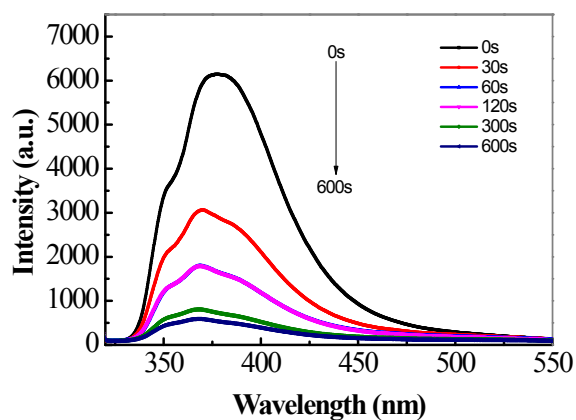

Figure S8. Time-dependent fluorescence intensity of PCzSiPh film in DNT. The film thickness is 52 nm.

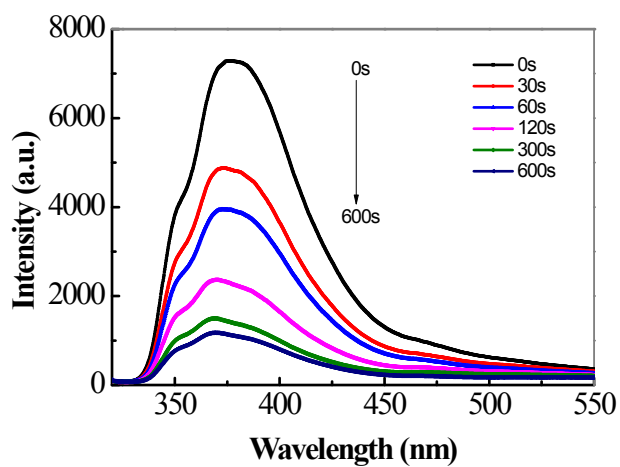

Figure S9. Time-dependent fluorescence intensity of PCzSiPh film in DNT. The film thickness is 95 nm.

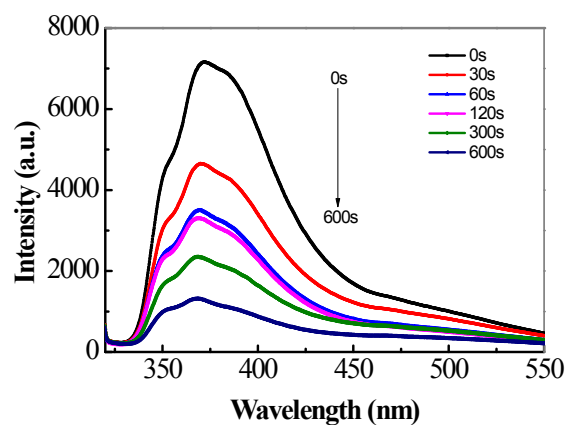

Figure S10. Time-dependent fluorescence intensity of PCzSiPh film in DNT. The film thickness is 122 nm.
